# Supplementary material
Source: Springer Nature journal article supplement (https://www.springermedizin.de/resource/supplementary/12943_2009_619_MOESM7_ESM.pdf/9554416)
Supplement: MOESM7 [file 9554416]

human TCTGATGCTTCCCGCTAATGTTTAAAGAACTGTTGGCTTAGAACAATTATGTAAATTTAAAAT<sup>-756</sup>  
 mouse -----CACCTGTGGAACGATAGAGT-----<sup>-882</sup>

human CAGGGACCTGGAAGCAACTT-----CTTTATTCAAACCGCTCTAGCCTTATA----<sup>-709</sup>  
 mouse CCAGAGCCGGGTGGTAATTTGTTT-----TTTCAAAATGCTTCAAAGCTATCCTTT<sup>-823</sup>

human AGGATGATTTAAGGTAATGTCTACAATAT<sup>-680</sup>  
 mouse AAGATGATTTAAGGTGGGTCCCAATAG<sup>-794</sup>

human CACTTATG-ACATAAAT-CAATGTGTTATAAAAATTACGTGTTAGT--GTCAGATTCCCTA<sup>-624</sup>  
 mouse TATATATGTATGTAGGTATGACTTATTTTAGAGAGGTTTGAGACTTGGTCTCATTACATA<sup>-558</sup>

↓ **EcoRV**<sup>b</sup>

human TAACTAGTTACAGAGGACGATTGTTGTGTAGA---GGATATCT---GACTAGAGTCAGTT<sup>-570</sup>  
 mouse GTCCTAGCTGTCTTGA-ATTCACTATGTAGACAGGCTGTCCAGAACTCACATAGATT<sup>-558</sup>

CDX2<sup>##</sup>

human TCC--CATCTGGGTTAAGAGTCCAGTCTTTACA-----ACTACTTG---CTAACA<sup>-525</sup>  
 mouse CACTGCATCTGCCTCCTAAGTGTGTGATTAAAGGTGTACACCACCACTCAGGCTTTACA<sup>-498</sup>

CDX2, CDX1<sup>##</sup>      TCF7L2 (TCF4)<sup>##</sup>

human ACATAAAAACCTCTTAAGAGTTCAAAGGAATG-CTAACAGGCAATCAGTTGCGTTTTTCATT<sup>-466</sup>  
 mouse ATATAATTTATGTTGTGAGTTTGTCTAGTGGTCTCTGCCTTCCTAATACAGTTCC---<sup>-</sup>

CDX2<sup>##</sup>      TCF7L2 (TCF4)<sup>##</sup>

human TTATTTTCTGTAAAGGT-AACATGAAATTTGCTGTT-TAACCACCTT--TGAATACAATT<sup>-410</sup>  
 mouse TCATGTTGTGGTAAATCACCACCTTAAAATTATTTTTGTTGCTACTTCATAACTGTAATT<sup>-498</sup>

human CAGTGGCATTGATTACTTTTACAATGTCGTGCCACCTCAACTACGTTTTTTCAAATCAGA<sup>-350</sup>  
 mouse TTGCTACTGTTATGAATCATAATGTAATATCTGTGTCTTCTG-ATGGTCTTAGGCCACC<sup>-439</sup>

TCF7L2 (TCF4)<sup>##</sup>

human AAAATGTTTTTCAACGATTATCTTTAATTTAATGTGCTCAG--AACGTCCATCGACAGC<sup>-292</sup>  
 mouse TTTGAATCCCCAAAAGGGTTAACCACAGGTTGAGAACCCTGCAAACAGTGTTAGATTC<sup>-379</sup>

CDX2<sup>##</sup>      CDX2<sup>##</sup>

human CT-CCATTTCTAAGTCTTGATGGTTG-ATCGAGCCGATCTGCAAC-----GAGGCGTTCTG<sup>-239</sup>  
 mouse CTACCACATGATAGAAAGGAGTGTGTCATCTCCTTGGTTTCTCACTTCGGAAGCTATCCA<sup>-319</sup>

CDX1<sup>##</sup>

human TTCGGAGTCGGAGA-TCGCCTTGCGGT-----<sup>-213</sup>  
 mouse TTCAGTCTTTCAAACCTACGTTGCAATAATGCTGAAATCATTTTTTCTACTGTGGTTAAA-gap-<sup>-259</sup>

human **CAGCGGGGGTTAGGGGTCCCTGGGCGCTGTGCTGCC-TCGGCC--CAGAGCTGCGCCTG**<sup>-156</sup>  
 mouse **-AGCGGGGGCTTCCCTTATTTGAGTATTTTGGGGTCAATCAGCCTGT**CAG**TGGCAAGTCTG**<sup>-109</sup>

human GCGGCTCGGCCGCGAGCC**CAGG**-GCGAA**CAGG**-----<sup>-124</sup>  
 mouse -CGGCTCCCCGGGTGGGTTCCGCC**CAGCCAG**aagctcaacgctgccctctgccgagca<sup>-50</sup>

↓ **Pst I**<sup>b</sup>

huma ACG**CAGTGCAGGG**ACGCG**CAGGGCCAGCGAGGGGAGCTGCAGGGTAAC**TTTCC**CAGGGA**<sup>-64</sup>  
 mouse CGGTGGTGC**CAGGGCCGCGCGGGGCCAGCGAGGGGAGCTGCAGGGCAGCTTTTC-CAGGGA**<sup>-21</sup>  
 →NM\_019987 (mouse)

SP1      FOXJ1, FOXA

human AAGCGCCGGTTCGTC**CAG**TAGAAGCCACC**CAGC**TTTTGTTTGTTCCTGCCGGAGG<sup>-4</sup>  
 mouse AAGCGCTGGTTCGTC**CAG**ACTAGAAGCCACTCTGCCTTTTGTGTTTGTCTGCCGGAGG<sup>+84</sup>

→NM\_014920.3 (human)

human CTG**GAAAACGGCCGGGTTCTGCTG**CACTACCATGCGCCGTGCGGCCCGTGC**GACTCGCC**<sup>+56</sup>  
 mouse CCG**GAGCGGC-GGTTCTGCTGGA**-TGCCACGCGCTGACGGGTGTGGACTTGCCGGG<sup>+142</sup>
